# Supplementary material for: Tailoring Carbon Nanotubes to Enhance Their Efficiency as Electron Shuttle on the Biological Removal of Acid Orange 10 under Anaerobic Conditions
Source: PubMed Central journal article supplement (PMC7764678; doi:10.3390/nano10122496), 2020-12-11
Supplement: nanomaterials-10-02496-s001.pdf [file nanomaterials-10-02496-s001.pdf]

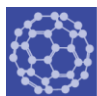

## Supplementary Material

**Table S1.** Substrate conversion, and methane production, after 29 h of biological anaerobic assays, in blank controls without dye, controls without CNM, and assays in the presence of 0.1 g L<sup>-1</sup> of CNM.

| Sample                      | Acetic acid<br>(mmol L <sup>-1</sup> ) |    | Propionic acid<br>(mmol L <sup>-1</sup> ) |           | Butyric acid<br>(mmol L <sup>-1</sup> ) |           | CH <sub>4</sub><br>(mmol L <sup>-1</sup> ) |
|-----------------------------|----------------------------------------|----|-------------------------------------------|-----------|-----------------------------------------|-----------|--------------------------------------------|
|                             | 0                                      | 29 | 0                                         | 29        | 0                                       | 29        | 29                                         |
| Blank                       | 2 ± 0.1                                | 0  | 10.4 ± 0.6                                | 0.7 ± 0.9 | 7.2 ± 0.8                               | 6.9 ± 0.2 | 13.1 ± 0.01                                |
| Control                     | 2.2 ± 0.1                              | 0  | 9.8 ± 0.8                                 | 0         | 6.6 ± 0.4                               | 5.6 ± 0.1 | 13.3 ± 0.01                                |
| CNT                         | 2.3 ± 0.6                              | 0  | 11.3 ± 1.1                                | 0         | 7.7 ± 0.6                               | 6.9 ± 0.5 | 11.9 ± 0.3                                 |
| CNT_MB                      | 2.7 ± 0.2                              | 0  | 10.1 ± 0.5                                | 0         | 6.8 ± 2.4                               | 4.5 ± 0.8 | 12.4 ± 0.3                                 |
| CNT_HNO <sub>3</sub>        | 2.3 ± 0.04                             | 0  | 10.6 ± 0.5                                | 0         | 7.7 ± 0.1                               | 5.5 ± 0.6 | 11.8 ± 0.4                                 |
| CNT@2%Fe                    | 3.6                                    | 0  | 11.7                                      | 0         | 8.3                                     | 5.9       | 13.1 ± 0.01                                |
| CNT@2%Fe_N_MB               | 3.7                                    | 0  | 11.7                                      | 0         | 8.3                                     | 7.3       | 12.7 ± 0.4                                 |
| CNT@2%Fe_N_HNO <sub>3</sub> | 2.4 ± 0.1                              | 0  | 10.6 ± 0.9                                | 0         | 7.5 ± 0.1                               | 5.7 ± 0.4 | 10.5 ± 0.5                                 |

**Table S2.** Formation rate (a.u./day) and quantity (%) of each of the detected by-products of the biological reduction of AO10, after 48 h of anaerobic process, in the absence (control) and presence of 0.1 g L<sup>-1</sup> of different CNM.

| Sample                    | Rate (a.u./day) |         |           | Products (%) |      |         |
|---------------------------|-----------------|---------|-----------|--------------|------|---------|
|                           | P1              | P2      | Aniline   | P1           | P2   | Aniline |
| Control                   | 2,505,302       | 132,558 | 1,271,117 | 65.3         | 3.4  | 31.3    |
| CNT                       | 3,705,959       | 192,570 | 3,577,374 | 64.3         | 2.5  | 33.2    |
| CNT_N_MB                  | 9,302,119       | 192,326 | 4,512,093 | 64.5         | 2.6  | 32.9    |
| CNT_HNO <sub>3</sub>      | 5,100,658       | 190,930 | 3,223,832 | 64.0         | 2.6  | 33.4    |
| CNT@2%Fe                  | 4,901,623       | 189,295 | 3,271,333 | 64.2         | 2.7  | 33.1    |
| CNT@2%Fe_N_MB             | 5,076,623       | 239,571 | 2,919,967 | 62.9         | 3.4  | 33.7    |
| CNT@2%Fe_HNO <sub>3</sub> | 3,105,069       | n.d.    | 2,012,016 | 70.4         | n.d. | 29.6    |

n.d. – Not determined.

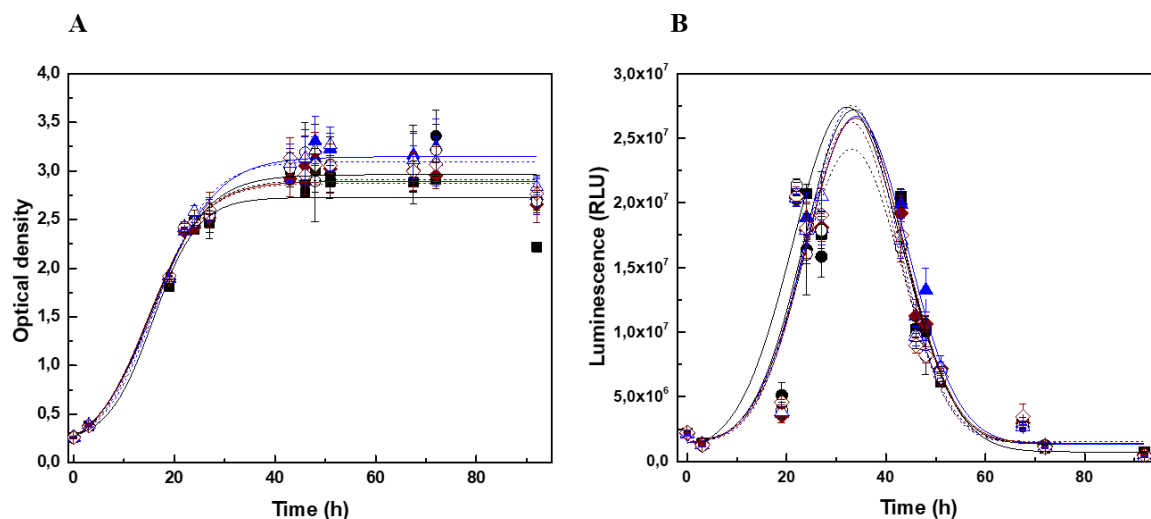

**Figure S1.** Effect of CNM on *Vibrio fischeri* growth (A) and luminescence emission (B): Control without CNM (■); CNT (●); CNT\_N\_MB (▲); CNT\_HNO<sub>3</sub> (◆); CNT@2%Fe (○); CNT@2%Fe\_N\_MB (△); CNT@2%Fe\_HNO<sub>3</sub> (◇).

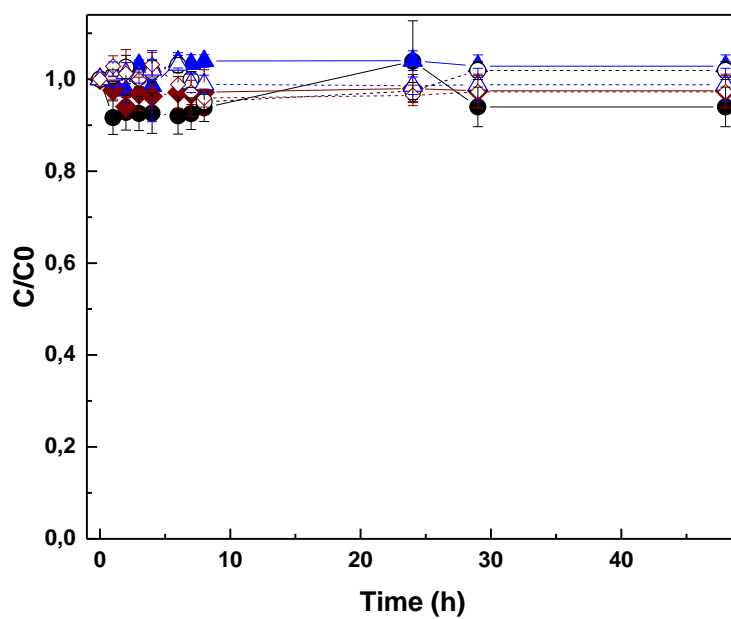

**Figure S2.** AO10 concentration over 48 h of reaction time, in abiotic conditions, in the presence of different CNM: CNT (●); CNT\_N\_MB (▲); CNT\_HNO<sub>3</sub> (◆); CNT@2%Fe (○); CNT@2%Fe\_N\_MB (△); CNT@2%Fe\_HNO<sub>3</sub> (◇).

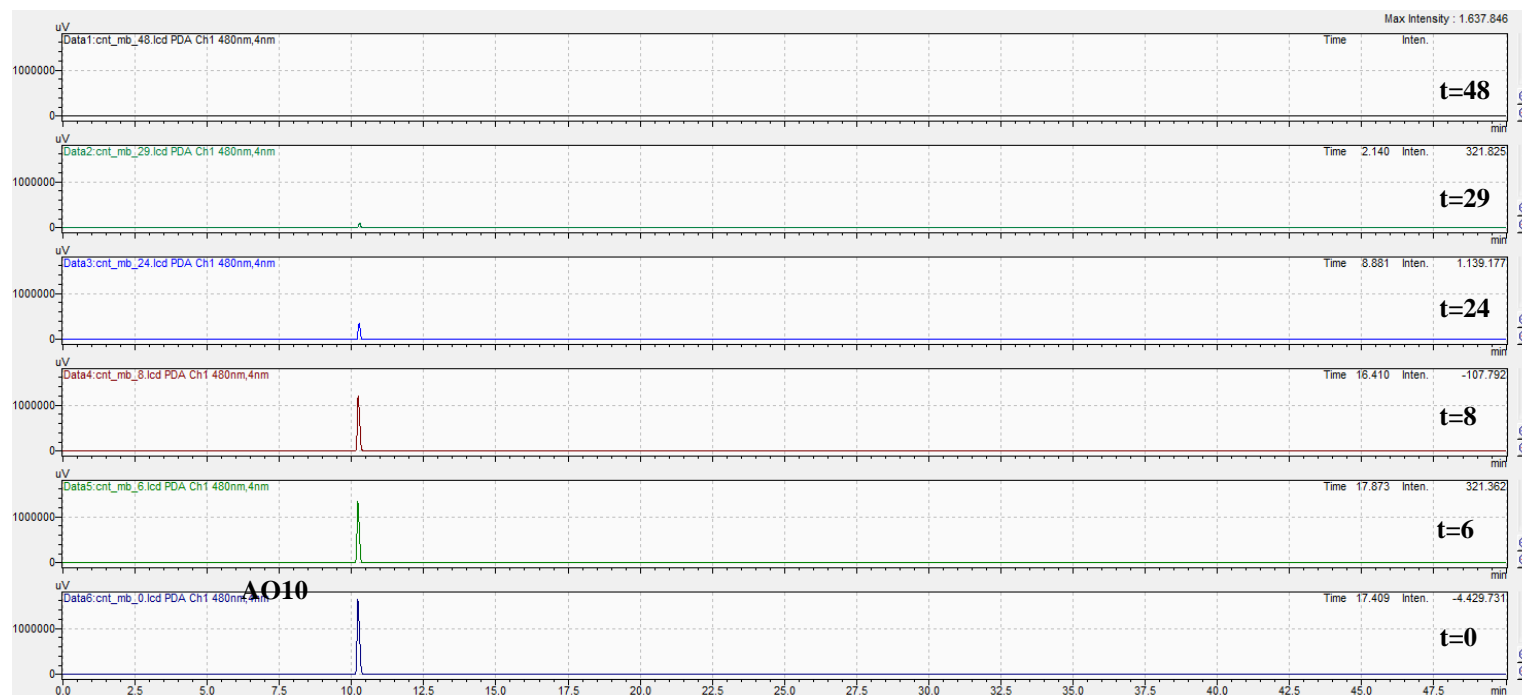

**Figure S3.** HPLC chromatograms of biological reduction of AO10, in the presence of CNT\_N\_MB, during 48 h of reaction as monitored at 480 nm. AO10 was detected at RT = 10.2 min.

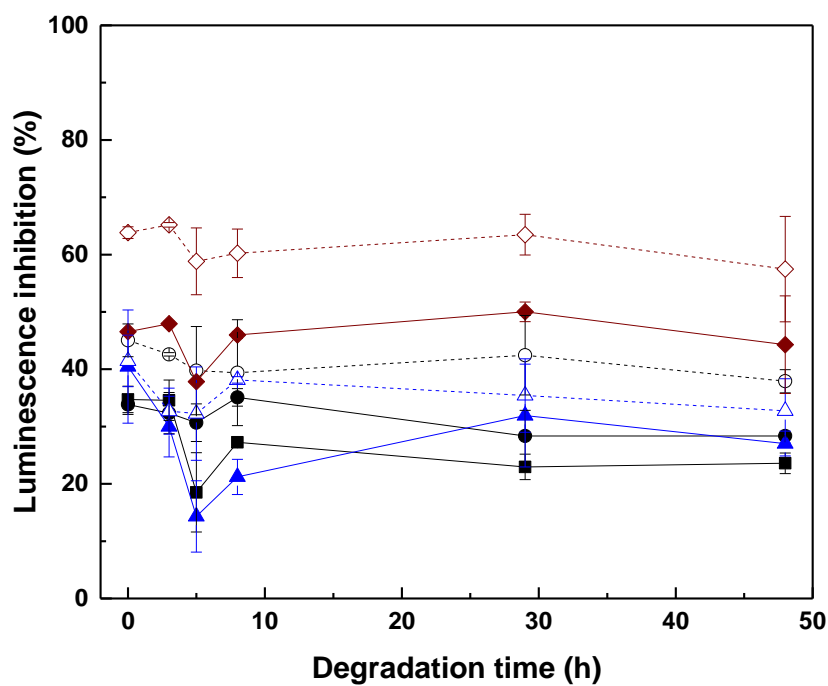

**Figure S4.** Toxicity of AO10 treatment samples over the degradation time, in the presence of  $0.1 \text{ g L}^{-1}$  of CNM, towards *Vibrio fischeri*. Control without CNM (■); CNT (●); CNT\_N\_MB (▲); CNT\_HNO<sub>3</sub> (◆); CNT@2%Fe (○); CNT@2%Fe\_N\_MB (△); CNT@2%Fe\_HNO<sub>3</sub> (◇).
